# Supplementary material
Source: PubMed Central journal article supplement (PMC6544546)

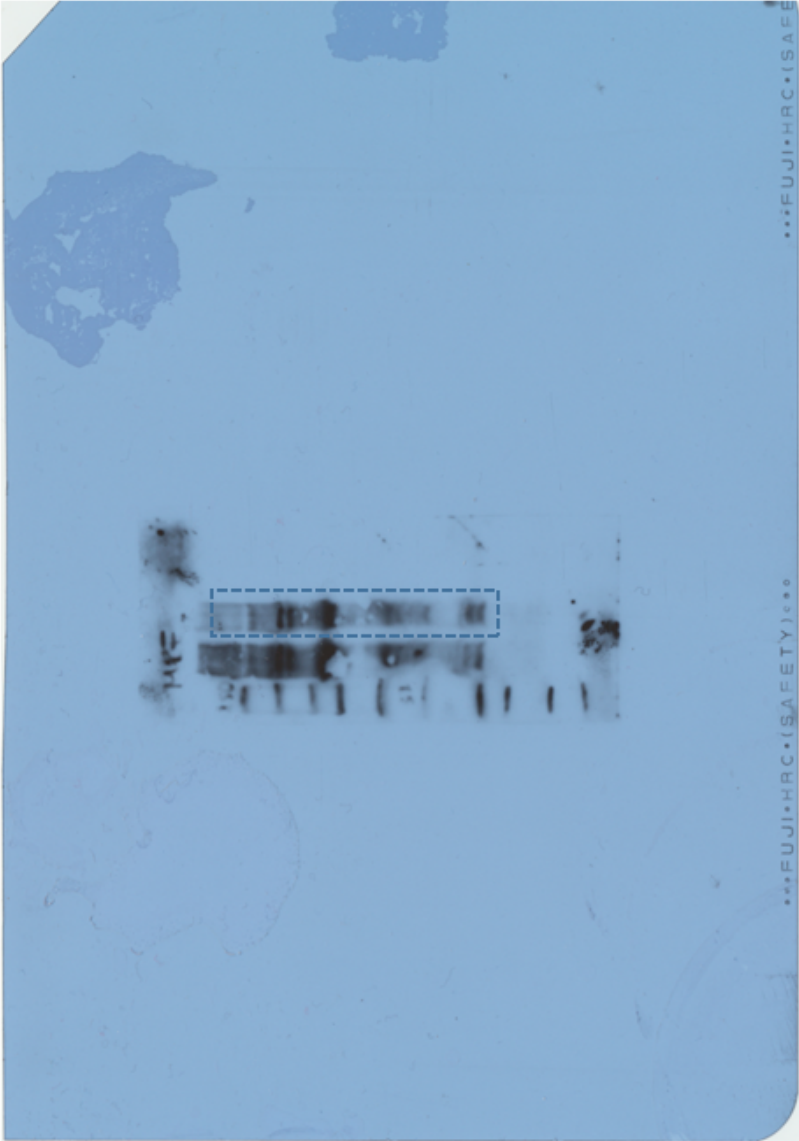

Supplement: EMS81327-supplement-Supporting_Figure_1.pdf [file EMS81327-supplement-Supporting_Figure_1.pdf]
